# Supplementary material for: Insights into the Antimicrobial, Antioxidant, Anti-SARS-CoV-2 and Cytotoxic Activities of Pistacia lentiscus Bark and Phytochemical Profile; In Silico and In Vitro Study
Source: MDPI journal article supplement (doi:10.3390/antiox11050930), 2022-05-09
Supplement: s1 [file s1]

## Supplementary Information

### Insights into the Antimicrobial, Antioxidant, Anti- SARs Cov-2 and Cytotoxic Activities of *Pistacia Lentiscus* Bark and Phytochemical Profile; *in silico* and *in vitro* study

Samy Selim <sup>1\*</sup>, Mohammed S. Almuhayawi <sup>2</sup>, Mohammed T. Alharbi <sup>3</sup>, Soad K. Al Jaouni <sup>4</sup>, Afaf Alharthi <sup>5</sup>, Basel A. Abdel-Wahab <sup>6,7</sup>, Mervat A.R.Ibrahim<sup>8</sup>, Amnah Mohammed Alsuhaibani <sup>9</sup>, Mona Warrad<sup>10</sup>, Khaled Rashed<sup>11\*</sup>

## General experimental procedures

UV/VIS: Shimadzu UV-visible recording spectrophotometer model-UV 240 (NRC, Egypt). <sup>1</sup>H-NMR and <sup>13</sup>C-NMR (Varian Unity Inova). MS (Finnigan MAT SSQ 7000, 70 ev). (Silica gel (0.063-0.200 mm for column chromatography) and Sephadex LH-20 (Pharmacia Fine Chemicals). Thin layer chromatography (TLC) F<sub>254</sub> plates. Solvent mixtures, BAW (*n*-butanol:acetic acid:water 4:1:5 upper phase, 15% acetic acid: water: glacial acetic acid: 85:15). Paper Chromatography (PC) Whatman No.1 (Whatman Led.Maid Stone, Kent, England) sheets for the qualitative detection of flavonoids and sugars.

### Structure Elucidation of the isolated compounds

**Methyl gallate (1):** 65 mg, white amorphous powder. UV  $\lambda_{\text{max}}$  (MeOH): 272. <sup>1</sup>H-NMR (DMSO-d<sub>6</sub>, 400 MHz): 6.9 (2H, s, H-2,6), 3.6 (3H, s, -OCH<sub>3</sub>). <sup>13</sup>C-NMR (DMSO-d<sub>6</sub>, 100 MHz): 166.8 (-COO), 146 (C-3,5), 138.9 (C-4), 119.8 (C-1), 109 (C-2,6), 52 (-OCH<sub>3</sub>).

**Gallic acid (2):** 35 mg, white amorphous powder. UV  $\lambda_{\text{max}}$  (MeOH): 270. <sup>1</sup>H-NMR (DMSO-d<sub>6</sub>, 400 MHz): 7.1 (2H, s, H-2,6). <sup>13</sup>C-NMR (DMSO-d<sub>6</sub>, 100 MHz): 166.9 (-COOH), 145.4 (C-3, 5), 137.8 (C-4), 121.4 (C-1), 109.6 (C-2,6).

**Kaempferol (3):** 8 mg, yellow powder, <sup>1</sup>H-NMR (400 MHz, DMSO-d<sub>6</sub>):  $\delta$  8.12 (2H, d, J = 8 Hz, H-2', 6'), 6.96 (2H, d, J = 8 Hz, H-3',5'), 6.47 (1H, d, J = 2 Hz, H-8), 6.19 (1H, d, J = 2 Hz, H-6). (+) ESI-MS: m/z 287 [M+H]<sup>+</sup>.

**Quercetin (4):** 15 mg, yellow powder. UV  $\lambda_{\text{max}}$  (MeOH): 255, 297, 371; (NaOMe): 270, 320, 420; (AlCl<sub>3</sub>): 270, 455; (AlCl<sub>3</sub>/HCl): 264, 303sh, 315sh, 428; (NaOAc): 264, 318, 383; (NaOAc/H<sub>3</sub>BO<sub>3</sub>): 259, 387. EI-MS: m/z 302.

**Kaempferol 3-O- $\alpha$ -rhamnoside (5):** 22 mg, yellow powder. <sup>1</sup>H-NMR (400 MHz, CD<sub>3</sub>OD):  $\delta$  7.74 (2H,d, J=8.2 Hz, H-2',6,). 6.92 (2H,d, J=8.2 Hz, H-3',5'). 6.44 (1H, d, J= 2.2 Hz, H-8), 6.24 (1H, d, J= 2.2 Hz, H-6). 5.42 (1H, d, J=2.4 Hz, H-1''), 0.94 (CH<sub>3</sub>, d, J =6.2 Hz). <sup>13</sup>C-NMR (100 MHz, CD<sub>3</sub>OD):  $\delta$  ppm 179.85 (C-4), 166.25 (C-7), 161.84 (C-5), 159.56 (C-4'), 158.28 (C-2), 136.45 (C-9), 132.28 (C-3), 122.94 (C-6'), 116.84 (C-2'), 116.24 (C-3') , 106.12 (C-1'), 103.75 (C-5'), 104.74 (C-10) , 100.12 (C-1''), 95.14 (C-8), 94.92 (C-6), 73.14 (C-5''), 72.45 (C-3''), 72.34 (C-2''), 72.28 (C-4''), 17.92 (CH<sub>3</sub>-rhamnosyl).

**Kaempferol 3-O- $\beta$ -glucoside (6):** 12 mg, yellow powder. UV  $\lambda_{\text{max}}$  (MeOH): 266, 344; (NaOMe): 274, 327sh, 401; (AlCl<sub>3</sub>): 274, 302, 349, 396; (AlCl<sub>3</sub>/HCl): 274, 347, 394; (NaOAc): 274, 307, 391; (NaOAc/H<sub>3</sub>BO<sub>3</sub>): 267, 352. <sup>1</sup>H-NMR (500 MHz, DMSO-d<sub>6</sub>): 8.12 (2H, d, J = 8.5 Hz, H-2',6'), 6.92 (2H, d, J=8.5 Hz, H-3',5'), 6.54 (1H, d, J = 2 Hz, H-8), 6.22 (1H, d, J = 2 Hz, H-6), 5.35 (1H,d, J=7.5, H-1''), 4-3.1 (5H,m, other sugar protons).

**Quercetin-3-O- $\beta$ -glucoside (7):** 22 mg, yellow amorphous powder: <sup>1</sup>H-NMR (400 MHz, DMSO-d<sub>6</sub>),  $\delta$  ppm 7.58 (2H, m, H-2'/6'), 6.83 (1H, d, J = 9 Hz, H-5'), 6.35 (1H,d, J = 2.5 Hz, H-8), 6.15 (1H,d, J = 2.5Hz, H-6), 5.46 (1H, d, J = 7.5 Hz, H-1''), 3.1-4 ppm (m, sugar protons). <sup>13</sup>C-NMR (100 MHz, DMSO-d<sub>6</sub>):  $\delta$  ppm 177.83 (C-4), 162.14 (C-7), 161.73 (C-5), 157.38 (C-2), 156.89 (C-9), 149.11 (C-3'), 148.47 (C-4'), 145.38 (C-5'), 133.77 (C-3), 121.61 (C-1'), 116.65 (C-2') 115.72 (6'), 104.21 (C-10), 101.44 (C-1''), 99.37 (C-6), 94.12 (C-8), 78.08 (C-5''), 77.03 (C-3''), 74.62 (C-2''), 70.45 (C-4''), 61.48 (C-6'').
